# Supplementary material for: SIV-specific CD8+ T cells are clonotypically distinct across lymphoid and mucosal tissues
Source: JCI journal article supplement (doi:10.1172/jci129161), 2019-10-29
Supplement: sd1 [file 1]

## SUPPLEMENTAL DATA

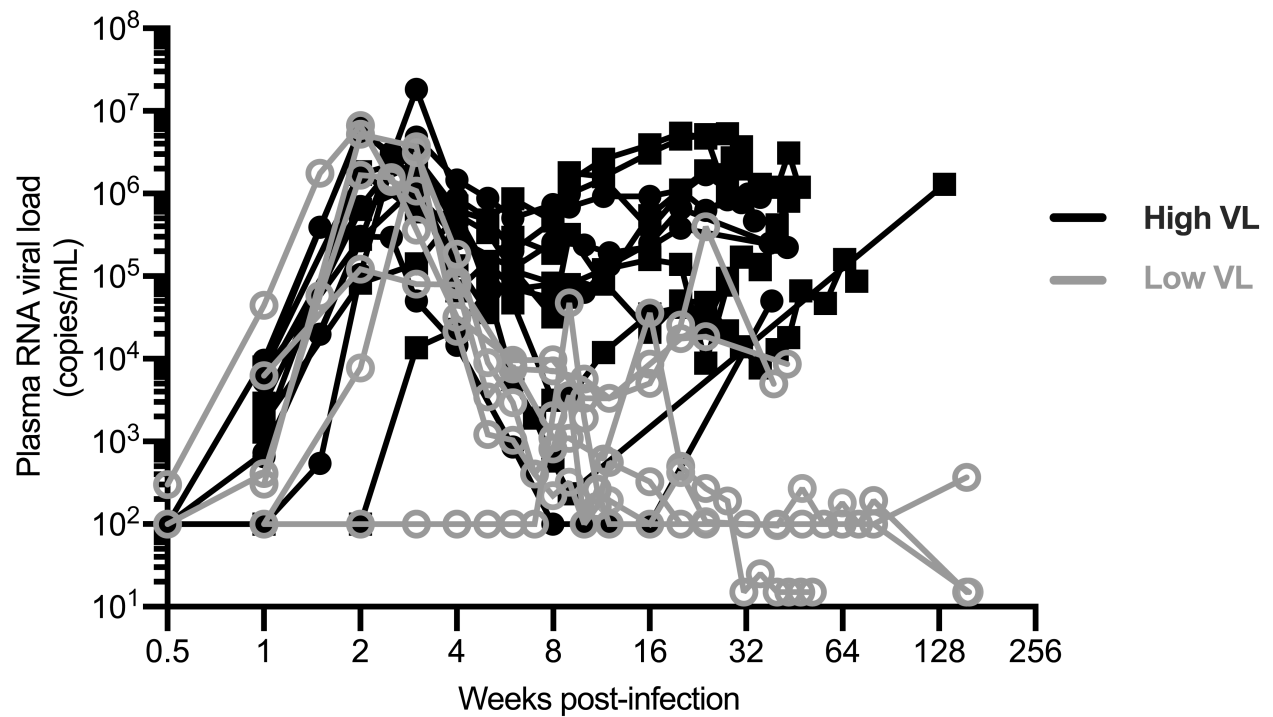

**Figure S1. VL trajectories in rhesus macaques with established SIV infection or AIDS.**

Plasma burden of viral RNA over time in rhesus macaques with high ( $n = 12$ ) or low VLs ( $n = 6$ ).

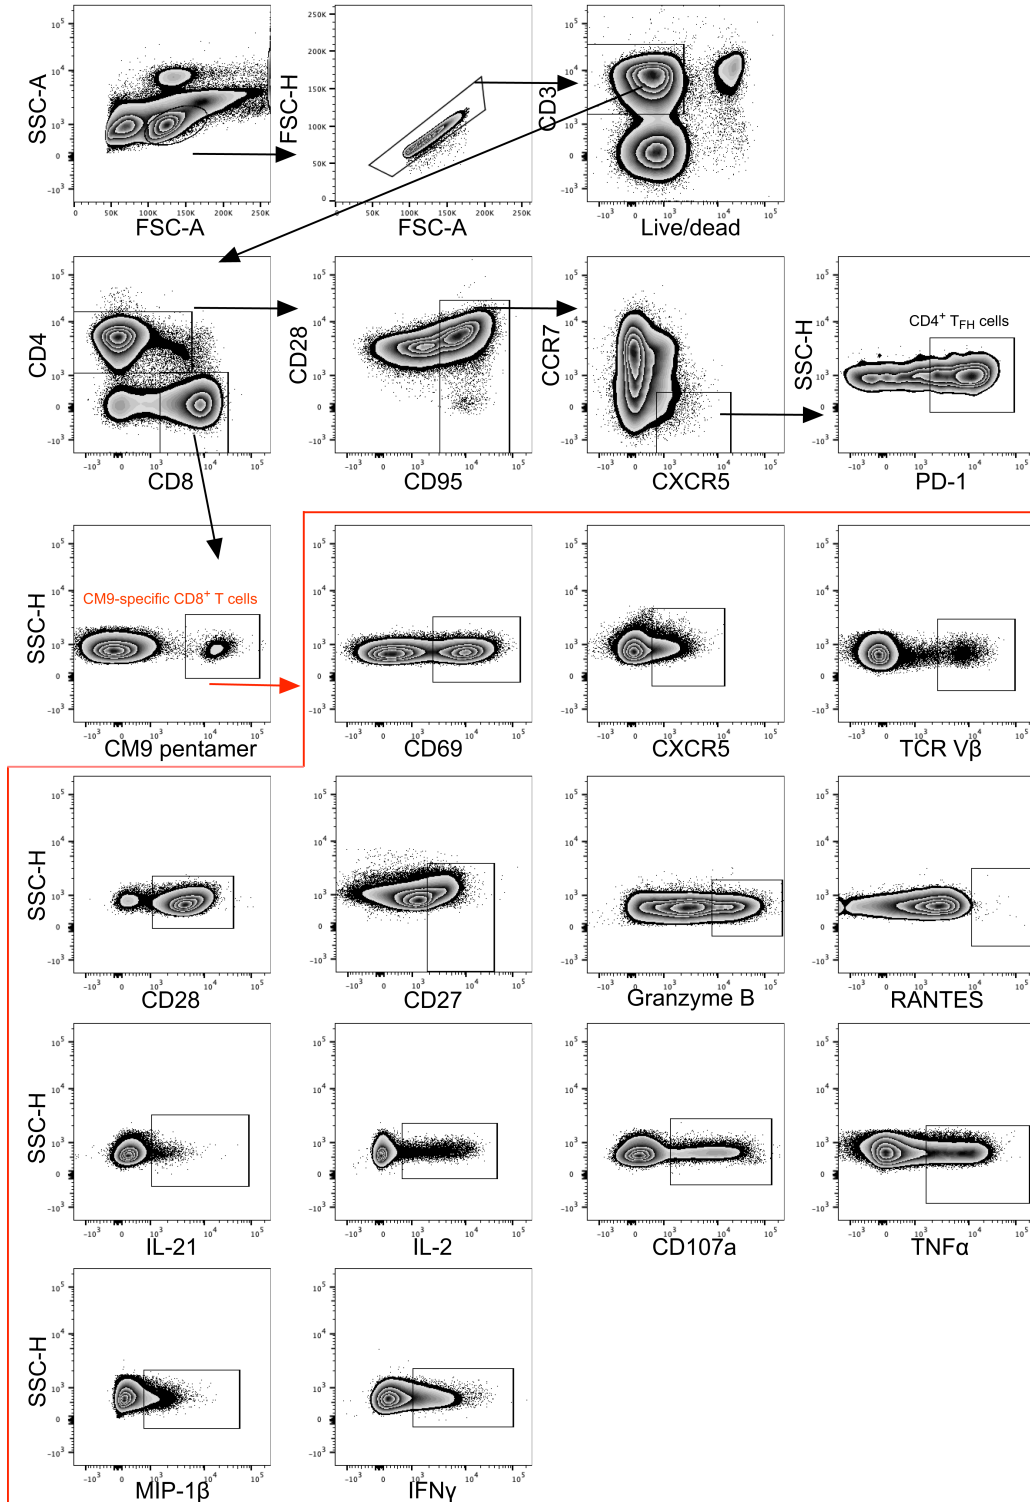

**Figure S2. Representative flow cytometric analysis and gating strategy.**

Analysis and gating of CD4<sup>+</sup> T<sub>H</sub> cells and pentamer<sup>+</sup> SIV-specific CD8<sup>+</sup> T cells.



| PBMC |      |                   |               | Spleen |      |                   |               | ALN/ILN |      |                   |               | MLN |      |                      |               | Gastrointestinal Tract |      |                 |               |
|------|------|-------------------|---------------|--------|------|-------------------|---------------|---------|------|-------------------|---------------|-----|------|----------------------|---------------|------------------------|------|-----------------|---------------|
| ID   | TRBV | CDR3              | TRBJ Freq (%) | ID     | TRBV | CDR3              | TRBJ Freq (%) | ID      | TRBV | CDR3              | TRBJ Freq (%) | ID  | TRBV | CDR3                 | TRBJ Freq (%) | ID                     | TRBV | CDR3            | TRBJ Freq (%) |
|      |      |                   |               | 594    | 7-4  | CASSLGVRHSGNTVY   | 1-3 53        | 594     | 15   | CASSELGQANNEKLF   | 1-4 50        | 594 | 7-4  | CASSLGVRHSGNTVY      | 1-3 53        | 594                    | 7-4  | CASSLGVRHSGNTVY | 1-3 79        |
|      |      |                   |               |        | 15   | CASSELGQANNEKLF   | 1-4 31        |         | 7-4  | CASSLGVRHSGNTVY   | 1-3 21        |     | 15   | CASSELGQANNEKLF      | 1-4 16        |                        | 15   | CASSLRGLGKETQY  | 2-5 10        |
|      |      |                   |               |        | 13   | CASSLGQNSNPQY     | 1-5 9         |         | 13   | CASSLGQNSNPQY     | 1-5 12        |     | 20-1 | CSARGERPSSNPQY       | 1-5 9         |                        | 5-5  | CASSLWGSYSYNEQF | 2-1 5         |
|      |      |                   |               |        | 7-4  | CASSYKRAGGAGNTVY  | 1-3 4         |         | 23-1 | CASSGQYNSNPQY     | 1-5 5         |     | 13   | CASSLGQNSNPQY        | 1-5 7         |                        | 7-4  | CASSHWGDTYNEQF  | 2-1 3         |
|      |      |                   |               |        | 20-1 | CSARGERPSSNPQY    | 1-5 2         |         | 13   | CASSLGSLQKLF      | 1-4 5         |     | 23-1 | CASSGQYNSNPQY        | 1-5 2         |                        | 6-9  | CASSPTGNSNPQY   | 1-5 3         |
|      |      |                   |               |        |      | Seqs: 45          |               |         | 7-9  | CASSLGVGADPQY     | 2-3 2         |     | 5-1  | CASSLDRETAQLF        | 2-2 2         |                        |      |                 |               |
|      |      |                   |               |        |      |                   |               |         | 19   | CASRRSTNEKLF      | 1-4 2         |     | 7-4  | CASSYKRAGGAGNTVY     | 1-3 2         |                        |      |                 |               |
|      |      |                   |               |        |      |                   |               |         | 27   | CASRPPRGQDGEKLF   | 1-4 2         |     | 6-9  | CASSKQNSNPQY         | 1-5 2         |                        |      |                 |               |
|      |      |                   |               |        |      |                   |               |         |      | Seqs: 42          |               |     | 13   | CASSLGSLQKLF         | 1-4 2         |                        |      |                 |               |
|      |      |                   |               |        |      |                   |               |         |      |                   |               |     | 6-1  | CASSAARRGNDYDT       | 1-2 2         |                        |      |                 |               |
|      |      |                   |               |        |      |                   |               |         |      |                   |               |     |      | Seqs: 43             |               |                        |      |                 |               |
| 760  | 10-2 | CASSGTGNSNPQY     | 1-5 64        | 760    | 10-2 | CASSGTGNSNPQY     | 1-5 76        | 760     | 10-2 | CASSGTGNSNPQY     | 1-5 36        | 760 | 10-2 | CASSGTGNSNPQY        | 1-5 100       | 760                    | 6-9  | CASSPTGNSNPQY   | 1-5 90        |
|      | 23-1 | CASSRPGGGTEAF     | 1-1 11        |        | 6-1  | CASSEAKRKSNEQY    | 2-7 14        |         | 6-1  | CASSEARRITDPQY    | 2-3 18        |     |      | Seqs: 9              |               |                        | 10-2 | CASSGTGNSNPQY   | 1-5 10        |
|      | 6-1  | CASSEAKRKSNEQY    | 2-7 7         |        | 5-6  | CASSSRPGANTEAF    | 1-1 3         |         | 7-4  | CASSLATGWTNPQY    | 1-5 14        |     |      |                      |               |                        |      |                 |               |
|      | 6-1  | CASSRGSFEQY       | 2-7 7         |        | 7-4  | CASDTGNQPY        | 1-5 3         |         | 7-8  | CASDTGNQPY        | 1-5 14        |     |      |                      |               |                        |      |                 |               |
|      | 7-9  | CASSLTDWGARRQNTQY | 2-4 4         |        | 6-1  | CASRGYHTDPQY      | 2-3 3         |         | 6-1  | CASSEAKRKSNEQY    | 2-7 7         |     |      |                      |               |                        |      |                 |               |
|      | 23-1 | CASSLWGSYSYNEQF   | 1-5 4         |        | 6-1  | CASSEARQSQNTQY    | 2-4 3         |         | 6-1  | CASSEQNSNPQY      | 1-3 4         |     |      |                      |               |                        |      |                 |               |
|      |      | Seqs: 28          |               |        |      | Seqs: 37          |               |         | 6-1  | CASSEQNSNPQY      | 1-5 4         |     |      |                      |               |                        |      |                 |               |
|      |      |                   |               |        |      |                   |               |         | 12-3 | CASSFYGSYEQF      | 2-1 4         |     |      |                      |               |                        |      |                 |               |
|      |      |                   |               |        |      |                   |               |         |      | Seqs: 28          |               |     |      |                      |               |                        |      |                 |               |
| 863  | 13   | CASSFAGNSNPQY     | 1-5 58        | 863    | 13   | CASSFAGNSNPQY     | 1-5 75        | 863     | 10-2 | CASSGTGNSNPQY     | 1-5 100       | 863 | 13   | CASSFAGNSNPQY        | 1-5 83        | 863                    | 6-1  | CASSTRTGNNNEQF  | 2-1 100       |
|      | 14   | CASSPWTTGSLNEQF   | 2-1 13        |        | 13   | CASSFAGNSKAPV     | 1-5 18        |         |      | Seqs: 44          |               |     | 6-1  | CASSTRTGNNNEQF       | 2-1 11        |                        |      |                 |               |
|      | 7-4  | CASSLGIGDDQPY     | 1-5 11        |        | 13   | CASSLLEYSNPQY     | 1-5 7         |         |      |                   |               |     | 4-1  | CASSQDPHRRWGLRQETQY  | 2-5 4         |                        |      |                 |               |
|      | 6-1  | CASSAAGNSNPQY     | 1-5 7         |        |      | Seqs: 44          |               |         |      |                   |               |     | 11-3 | CASSRQGGFGSGNTVY     | 1-3 2         |                        |      |                 |               |
|      | 6-1  | CASSEANRADSDYT    | 1-2 4         |        |      |                   |               |         |      |                   |               |     |      | Seqs: 46             |               |                        |      |                 |               |
|      | 5-4  | CASSFAGNSNPQY     | 1-5 2         |        |      |                   |               |         |      |                   |               |     |      |                      |               |                        |      |                 |               |
|      | 5-4  | CASSWQGGQPY       | 1-5 2         |        |      |                   |               |         |      |                   |               |     |      |                      |               |                        |      |                 |               |
|      | 2    | CASRTLQGLYDT      | 1-2 2         |        |      |                   |               |         |      |                   |               |     |      |                      |               |                        |      |                 |               |
|      |      | Seqs: 45          |               |        |      |                   |               |         |      |                   |               |     |      |                      |               |                        |      |                 |               |
| 867  | 28   | CASSLQGLVEKLF     | 1-4 52        | 867    | 23-1 | CASSGQYNSNPQY     | 1-5 32        | 867     | 23-1 | CASSGQYNSNPQY     | 1-5 69        | 867 | 23-1 | CASSGQYNSNPQY        | 1-5 57        | 867                    | 23-1 | CASSGQYNSNPQY   | 1-5 47        |
|      | 23-1 | CASSQGGYNSNPQY    | 1-5 33        |        | 13   | CASNQGAVLNSNPQY   | 1-5 21        |         | 11-3 | CASSLQGGDDPY      | 2-3 11        |     | 11-3 | CASSLQGGDDPY         | 1-6 17        |                        | 11-3 | CASSLQGGDDPY    | 1-6 14        |
|      | 23-1 | CASSQKRVNSPLH     | 1-6 15        |        | 11-3 | CASSPTGTTNEKLF    | 1-4 18        |         | 9    | CASSTGRQNTVY      | 1-3 6         |     | 4-1  | CASSQDGEQPY          | 1-5 11        |                        | 9    | CASSLQGGSEKLF   | 1-4 14        |
|      |      | Seqs: 27          |               |        | 11-3 | CASSLQGGDDPY      | 1-6 8         |         | 5-5  | CASRTGTGTGNTVY    | 1-5 3         |     | 6-1  | CASSEGFLGTGSLYNSNPQY | 1-5 7         |                        | 16   | CASSREQGLV      | 1-4 7         |
|      |      |                   |               |        | 3-1  | CASSPRLGGACQNTQY  | 2-4 5         |         | 5-5  | CASRTGTGTGNTVY    | 1-3 3         |     | 6-1  | CASSNIRATNEKLF       | 1-4 4         |                        | 7-4  | CASSSGGTYNSPLH  | 1-6 7         |
|      |      |                   |               |        | 28   | CASSLQGLVEKLF     | 1-4 5         |         | 11-3 | CASSLQGGDDPY      | 1-6 3         |     | 10-2 | CASSLQGGDDPY         | 1-5 2         |                        | 5-1  | CASSLAIDQPY     | 2-3 2         |
|      |      |                   |               |        | 6-1  | CASSGAGNSNPQY     | 1-5 3         |         | 6-1  | CASSAARRGDDPY     | 1-5 3         |     | 6-1  | CASSSEAGNSNPQY       | 1-3 2         |                        | 7-4  | CASSYSSGTYGQPY  | 1-5 2         |
|      |      |                   |               |        | 6-9  | CASSYSGSNGNPQY    | 1-5 3         |         | 2    | CASSDLDRDWGDTAQLF | 2-2 3         |     |      | Seqs: 46             |               |                        | 5-1  | CASSYKGLVGQPY   | 2-7 2         |
|      |      |                   |               |        | 23-1 | CASSQKRVNSPLH     | 1-6 3         |         |      | Seqs: 35          |               |     |      |                      |               |                        | 6-9  | CASSYSGSNGNPQY  | 1-5 2         |
|      |      |                   |               |        | 5-1  | CASSLAPTAQLF      | 2-2 3         |         |      |                   |               |     |      |                      |               |                        | 7-4  | CASLSEATNEKLF   | 1-4 2         |
|      |      |                   |               |        |      | Seqs: 38          |               |         |      |                   |               |     |      |                      |               |                        |      |                 |               |
|      |      |                   |               |        |      |                   |               |         |      |                   |               |     |      |                      |               |                        |      |                 |               |
| 871  | 13   | CASSLASFSNPQY     | 1-5 32        | 871    | 13   | CASSLASFSNPQY     | 1-5 46        | 871     | 13   | CASSLASFSNPQY     | 1-5 46        | 871 | 13   | CASSLASFSNPQY        | 1-5 33        | 871                    | 5-1  | CASSLASFSNPQY   | 1-5 31        |
|      | 2    | CASSRADPNSYEQY    | 2-7 16        |        | 7-4  | CASSRADPNSYEQY    | 2-7 11        |         | 12-3 | CASSPTGSNEKLF     | 1-4 17        |     | 6-9  | CASSPTGSNEKLF        | 1-4 10        |                        | 10-2 | CASSPVEQY       | 2-7 12        |
|      | 2    | CASSPYEQY         | 2-7 14        |        | 14   | CASSQRGARDYDT     | 1-2 7         |         | 2    | CASSRADPNSYEQY    | 2-7 9         |     | 12-3 | CASSFARAPQETQY       | 2-5 10        |                        | 6-1  | CASSSEAGNSNPQY  | 1-5 12        |
|      | 4-1  | CASSQAGTGNSYEQY   | 2-7 11        |        | 7-4  | CASSPGTGVGIGQPY   | 2-7 7         |         | 6-1  | CASSGQNSNPQY      | 1-5 6         |     | 6-1  | CASSALRQKDDYT        | 1-2 8         |                        | 14   | CASSQRGARDYDT   | 1-2 8         |
|      | 2    | CASRDGRARNTVY     | 1-3 11        |        | 6-9  | CASSAGLGTHKNTQY   | 2-4 7         |         | 6-9  | CASSAGLGTHKNTQY   | 2-4 3         |     | 10-2 | CASSVAGNSNPQY        | 1-5 8         |                        | 27   | CASSGGGVYEQY    | 2-7 8         |
|      | 7-4  | CASSLDLRSVDPQY    | 2-3 8         |        | 7-4  | CASSPGLGGAKDPQY   | 2-3 4         |         | 7-4  | CASSAGLGTHKNTQY   | 2-4 3         |     | 7-4  | CASSPQNEQF           | 2-1 5         |                        | 6-9  | CASSYVANSNPQY   | 1-5 4         |
|      | 5-5  | CASSVNRDEQY       | 2-7 3         |        | 7-4  | CASSLGREAF        | 1-1 4         |         | 10-2 | CASSVAGNSNPQY     | 1-5 3         |     | 15   | CASSKERPSGTQY        | 2-4 5         |                        | 6-1  | CASSSEGERGTPQY  | 2-3 4         |
|      | 13   | CASSLRQYNSNPQY    | 1-5 3         |        | 7-4  | CASSLGREAF        | 1-1 4         |         | 7-4  | CASSLAGIGVSNQPY   | 2-7 3         |     | 7-4  | CASSLDGRNVDYT        | 1-2 5         |                        | 10-2 | CASSSEAGNSNPQY  | 1-5 4         |
|      | 7-4  | CASSFDGNSYEQY     | 2-7 3         |        | 10-2 | CASSERHSNTPQY     | 2-3 4         |         | 10-2 | CASSGQNSNPQY      | 1-5 3         |     | 14   | CASSQELVNSPLH        | 1-6 3         |                        | 6-9  | CASSYETGGLNTPQY | 1-5 4         |
|      |      | Seqs: 37          |               |        | 3-1  | CASSRSIETGGERNTQY | 2-4 4         |         | 5-5  | CASSLWQGRNPQY     | 1-5 3         |     | 9    | CASSPEPQGGTDPQY      | 2-3 3         |                        | 28   | CASSLSLNSRNTAF  | 1-1 4         |
|      |      |                   |               |        |      | Seqs: 28          |               |         | 6-1  | CASSFASRASGASVLT  | 2-6 3         |     | 6-1  | CASSGGSNEKLF         | 1-4 3         |                        | 2    | CASSLRADFNSYEQY | 2-7 4         |
|      |      |                   |               |        |      |                   |               |         |      | Seqs: 35          |               |     | 14   | CASSQRGARDYDT        | 1-2 3         |                        | 27   | CASSLQGLFGASVLT | 2-6 4         |
|      |      |                   |               |        |      |                   |               |         |      |                   |               |     | 29-1 | CSVEDHGRVYDT         | 1-2 3         |                        | 6-1  | CASSGQNSNPQY    | 1-5 4         |
|      |      |                   |               |        |      |                   |               |         |      |                   |               |     | 2    | CASSRADPNSYEQY       | 2-7 3         |                        |      |                 |               |
|      |      |                   |               |        |      |                   |               |         |      |                   |               |     | 6-9  | CASSYAGNSNPQY        | 1-5 3         |                        |      |                 |               |
|      |      |                   |               |        |      |                   |               |         |      |                   |               |     |      | Seqs: 40             |               |                        |      |                 |               |
| F98  | 6-9  | CASSGQNSNPQY      | 1-5 40        | F98    | 6-9  | CASSGQNSNPQY      | 1-5 38        | F98     | 6-9  | CASSGQNSNPQY      | 1-5 53        | F98 | 6-9  | CASSGQNSNPQY         | 1-5 62        | F98                    | 6-1  | CASSLRDRKDPQY   | 2-3 53        |
|      | 13   | CASSGGLGPSQNTQY   | 2-4 9         |        | 27   | CASSPTDNLNPQY     | 1-5 35        |         | 6-1  | CASSADGNSNPQY     | 1-5 18        |     | 20-1 | CASNIAPPNGSNTQY      | 2-4 10        |                        | 6-1  | CASSRGQGGQPY    | 1-5 28        |
|      | 6-9  | CASSYAGNSNPQY     | 1-5 9         |        | 6-1  | CASSDGGNSNPQY     | 1-5 6         |         | 6-9  | CASSKAGNSNPQY     | 1-5 11        |     | 27   | CASSLRGTEDYDT        | 1-2 5         |                        | 6-9  | CASSKAGNSNPQY   | 1-5 19        |
|      | 6-1  | CASSGQNSNPQY      | 1-5 9         |        | 13   | CASSFGLGPSQNTQY   | 2-4 6         |         | 6-1  | CASSEQNSQNTQY     | 2-4 8         |     | 6-9  | CASSYAGNSNPQY        | 1-5 5         |                        |      |                 |               |
|      | 23-1 | CASSQKRVNSPLH     | 1-6 6         |        | 6-1  | CASSSEAGNSNPQY    | 1-5 3         |         | 6-1  | CASSSEAGNSNPQY    | 1-5 3         |     | 6-1  | CASSLRDRKDPQY        | 2-3 5         |                        |      |                 |               |
|      | 29-1 | CSVVNGEYQF        | 2-1 6         |        | 10-2 | CASSSEAGNSNPQY    | 1-5 3         |         | 6-1  | CASSGQNSNPQY      | 1-5 3         |     | 27   | CASSLDNRNSGASVLT     | 2-6 5         |                        |      |                 |               |
|      | 5-5  | CASSLASVQVVNTAF   | 1-1 3         |        | 6-9  | CASSKAGNSNPQY     | 1-5 3         |         | 6-9  | CASSDGGNSNPQY     | 1-5 3         |     | 6-1  | CASSSEAGNSNPQY       | 1-5 5         |                        |      |                 |               |
|      | 27   | CASSLDNRNSGASVLT  | 2-6 3         |        | 11-3 | CASSRRODPY        | 1-5 3         |         | 27   | CASSPTDNLNPQY     | 1-5 3         |     | 6-1  | CASSSEAGNSNPQY       | 2-3 3         |                        |      |                 |               |
|      | 6-1  | CASSEAMRGTDQY     | 2-3 3         |        | 5-5  | CASSLVGQADPQY     | 2-3 3         |         |      | Seqs: 38          |               |     | 6-1  | CASSEAMRGTDQY        | 2-3 3         |                        |      |                 |               |
|      | 10-2 | CASSSEAGNSNPQY    | 1-5 3         |        |      | Seqs: 34          |               |         |      |                   |               |     |      | Seqs: 39             |               |                        |      |                 |               |
|      | 6-1  | CASSLRDRKDPQY     | 2-3 3         |        |      |                   |               |         |      |                   |               |     |      |                      |               |                        |      |                 |               |
|      | 6-9  | CASSGQNSNPQY      | 1-5 3         |        |      |                   |               |         |      |                   |               |     |      |                      |               |                        |      |                 |               |
|      | 6-1  | CASSAQNSNPQY      | 1-5 3         |        |      |                   |               |         |      |                   |               |     |      |                      |               |                        |      |                 |               |
|      | 6-1  | CASSSEAGNSNPQY    | 1-5 3         |        |      |                   |               |         |      |                   |               |     |      |                      |               |                        |      |                 |               |
|      |      | Seqs: 35          |               |        |      |                   |               |         |      |                   |               |     |      |                      |               |                        |      |                 |               |

**Figure S4. Clonotypic architecture of CM9-specific CD8<sup>+</sup> T cell populations in rhesus macaques with low VLs.**

CDR3 $\beta$  amino acid sequences, *TRBV* and *TRBJ* gene use, and relative frequency of CD8<sup>+</sup> T cell clonotypes specific for CM9. Colored boxes in the CDR3 column indicate public clonotypes. Colored boxes in the frequency column indicate shared clonotypes across tissues within individual rhesus macaques.

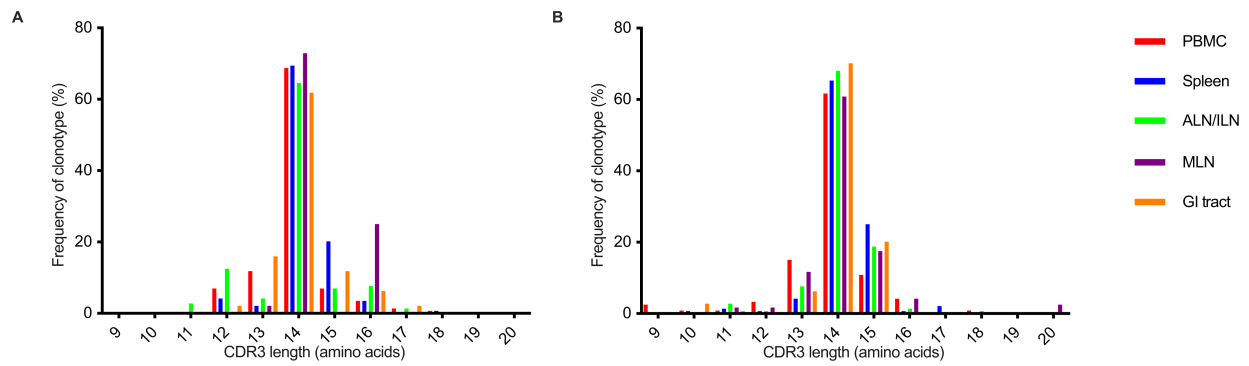

**Figure S5. Distribution of CDR3 $\beta$  lengths across CM9-specific CD8<sup>+</sup> T cell populations.**

**(A)** CDR3 $\beta$  lengths in rhesus macaques with high VLs ( $n = 6$ ). **(B)** CDR3 $\beta$  lengths in rhesus macaques with low VLs ( $n = 6$ ).

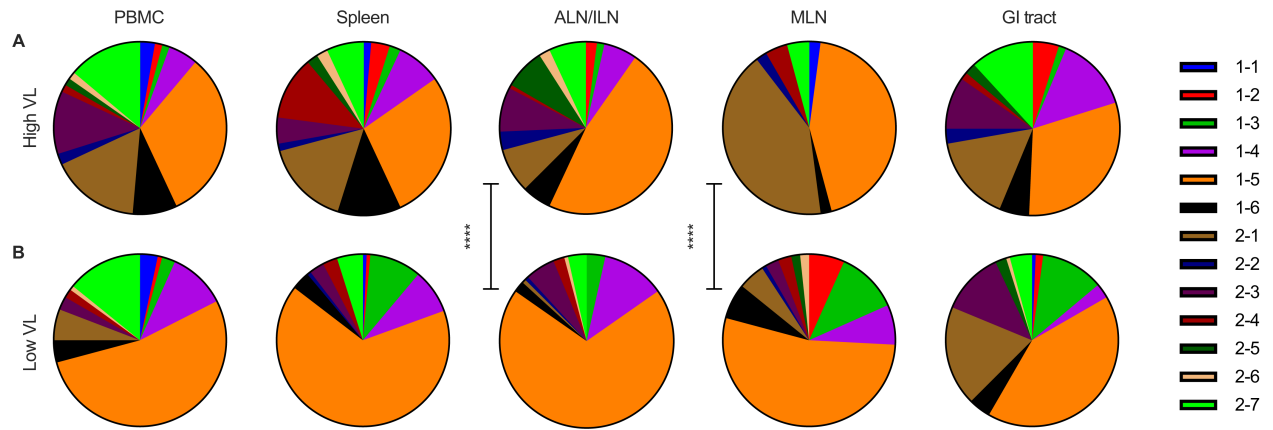

**Figure S6. *TRBJ* gene use among CM9-specific CD8<sup>+</sup> T cell populations.**

**(A)** *TRBJ* gene use in rhesus macaques with high VLs (n = 6). **(B)** *TRBJ* gene use in rhesus macaques with low VLs (n = 6). Significance was determined using the permutation test in SPICE.

\*\*\*\* $P < 0.0001$ .
